# Supplementary material
Source: PubMed Central journal article supplement (PMC7986991)
Supplement: NIHMS1674978-supplement-Compiled_Supplementary_Tables.pdf [file NIHMS1674978-supplement-Compiled_Supplementary_Tables.pdf]

**Supplementary Table 1: Data as mean ± sem**

| <b>Fig #</b> | <b>units</b> | <b>Sham-ACSF/Saline</b> | <b>Sham Drug (CLI095 or LPS-RSU)</b> | <b>FPI ACSF/saline</b>   | <b>Sham Drug (CLI095 or LPS-RSU)</b> |
|--------------|--------------|-------------------------|--------------------------------------|--------------------------|--------------------------------------|
| 1d           | mV           | 0.21±0.08               | 1.04±0.17                            | 1.77±0.49                | 0.14±0.11                            |
| 1e           | mV/ms        | 0.96±0.13               | 1.99±0.15                            | 2.52±0.34                | 0.83±0.18                            |
| 1g           | a.u          | 0.90±0.05               | 1.03±0.12                            | 0.12±0.02                | 0.67±0.06                            |
| 1i           | a.u          | 100±0.0                 | 101.7±4.56                           | 137.18±8.4               | 110.18±5.34                          |
| 1j           | a.u          | 100±0.0                 | 105.34±7.30                          | 108.96±9.67              | 103.78±7.25                          |
| 1k           | a.u          | 100±0.0                 | 108.80±5.50                          | 108.8±6.96               | 108.00±7.74                          |
| 1l           | a.u          | 100±0.0                 | 107.80±3.83                          | 106.00±6.54              | 112.10±8.50                          |
| 5c           | mV           | 0.02±0.01               | 0.85±0.16                            | 1.50±0.15                | 0.45±0.11                            |
| 5f           | min.         | 46±0.89                 | 19.22±1.34                           | 9.85±0.44                | 113.66±20.71                         |
| 5g           | min.         | 47.12±1.44              | 18.12±1.00                           | 11±0.96                  | 119.00±8.70                          |
| 6b           | min.         | 47.71±1.76              | 15.62±1.54                           | 13.85±2.12               | 180±0                                |
| 6d           | Min.         | 52.15±4.27              | 15.63±1.5                            | 13.75±1.96               | 180±0                                |
| 6h           | min.         | 41.62±1.53              | 17.57±1.39                           | 12.37±1.91               | 9.85±1.35                            |
| 7c           | a.u          | 1.00±0                  | 1.04±0.10                            | 3.16±1.09                | 0.95±0.08                            |
| 7d           | a.u          | 1.00±0                  | 0.89±0.04                            | 1.93±0.22                | 1.15±0.09                            |
| 7e           | a.u          | 1.00±0                  | 0.93±0.50                            | 1.58±0.12                | 0.91±0.09                            |
| 7h           | # of cells   | 8.17±3.47               | 7.01±1.95                            | 50.60±11.75              | 18.09±5.10                           |
| 7i           | # of cells   | 70.17±16.49             | 97.78±20.68                          | 1228.93±316.49           | 215.60±29.91                         |
| 7j           | # of cells   | 227.81±14.55            | 138.33±15.59                         | 66.80±13.07              | 207.77±17.95                         |
| <b>Fig #</b> |              | <b>WT</b>               | <b>KO</b>                            |                          |                                      |
| 2d           | a.u          | 0.16±0.02               | 1.33±0.80                            |                          |                                      |
| <b>Fig #</b> |              | <b>ACSF</b>             | <b>HMGB1</b>                         | <b>LPS-RSU</b>           |                                      |
| 2f           | a.u          | 0.16±0.02               | 0.12±0.03                            | 0.92±0.16                |                                      |
| <b>Fig #</b> |              | <b>SHAM</b>             | <b>FPI</b>                           |                          |                                      |
| 3c           | min.         | 50.44±1.71              | 12.63±1.24                           |                          |                                      |
| 4b           | a.u          | 0%                      | 62%                                  |                          |                                      |
| 8c           | pA.sec       | 17.21±0.93              | 87.02±10.83                          |                          |                                      |
| <b>Fig #</b> |              | <b>ACSF</b>             | <b>LPS-RSU</b>                       | <b>LPS-RSU +Ampakine</b> |                                      |
| 8e           | pA.sec       | 87.02±10.83             | 26.73±3.02                           | 208.95±2.71              |                                      |
| <b>Fig #</b> |              | <b>Saline</b>           | <b>LPS-RSU</b>                       | <b>LPS-RSU +Ampakine</b> |                                      |
| 8h           | min.         | 13.75±1.96              | 180±0                                | 41±4.59                  |                                      |

**Supplementary Table 2: Statistical analysis details**

| Figure number | Test Used                                                             |                            | n               |                                          | Descriptive stats (Average, variance) | P Value     | DEGREES OF FREEDOM & F/t/z/R/ETC VALUE |
|---------------|-----------------------------------------------------------------------|----------------------------|-----------------|------------------------------------------|---------------------------------------|-------------|----------------------------------------|
|               | Which test                                                            | Section & Paragraph #      | Exact value     | Defined                                  | Reported                              | Exact Value | Value                                  |
| 1 d           | Two way RM ANOVA test, followed by a Tukey's multiple comparison test | Fig. legend                | 5, 6            | No. of Slices from at least 3 rats/group | Error bars are mean +/- s.e.m.        | P=0.011     | F(1,9)=10.16                           |
| 1 e           | Two way RM ANOVA test, followed by a Tukey's multiple comparison test | Fig. legend                | 5, 6            | No. of Slices from at least 3 rats/group | Error bars are mean +/- s.e.m.        | P<0.001     | F(1,9)=23.064                          |
| 1 g           | TW ANOVA test, followed by a Tukey's multiple comparison test         | Fig. legend; Result para 1 | 6 in each group | No. of cells from at least 3 rats/group  | Error bars are mean +/- s.e.m.        | P=0.009     | F(1,20)=8.437                          |
| 1 i           | TW ANOVA test, followed by a Tukey's multiple comparison test         | Fig. legend: Result para 1 | 6 in each group | No. of Slices from at least 3 rats/group | Error bars are mean +/- s.e.m.        | P=0.0017    | F(1,20)=6.80                           |
| 1 j           | TW ANOVA test, followed by a Tukey's multiple comparison test         | Fig. legend; Result para 1 | 6 in each group | No. of Slices from at least 3 rats/group | Error bars are mean +/- s.e.m.        | p-0.465     | F(1,20)=0.465                          |
| 1 k           | TW ANOVA test, followed by a Tukey's multiple comparison test         | Fig. legend: Result para 1 | 6 in each group | No. of Slices from at least 3 rats/group | Error bars are mean +/- s.e.m.        | P=0.573     | F(1,20)=0.328                          |
| 1 l           | TW ANOVA test, followed by a Tukey's multiple comparison test         | Fig. legend; Result para 1 | 6 in each group | No. of Slices from at least 3 rats/group | Error bars are mean +/- s.e.m.        | p-0.883     | F(1,20)=0.022                          |

|     |                                                                        |                            |                 |                                                              |                               |         |                                    |
|-----|------------------------------------------------------------------------|----------------------------|-----------------|--------------------------------------------------------------|-------------------------------|---------|------------------------------------|
|     | comparison test                                                        |                            |                 |                                                              |                               |         |                                    |
| 2 e | One way ANOVA by ranks, followed by a Tukey's multiple comparison test | Fig. legend; Result para 2 | 7 in each group | No. of cells from at least 3 different well plates per group | Error bars are mean +/- s.e.m | P=0.001 | H=13.588 with 2 degrees of freedom |
| 3 c | Student's T-Test                                                       | Fig. legend; Result para 3 | 9,12            | No. of rats per group                                        | Error bars are mean +/- s.e.m | P<0.001 | T=17.357                           |
| 5 c | TW ANOVA test, followed by a Tukey's multiple comparison test          | Fig. legend; Result para 4 | 6 in each group | No. of Slices from at least 3 rats/group                     | Error bars are mean +/- s.e.m | P<0.001 | F(1,20)=32.072                     |
| 5 f | TW ANOVA test, followed by a Tukey's multiple comparison test          | Fig. legend; Result para 5 | 8 in each group | No. of rats per group                                        | Error bars are mean +/- s.e.m | P<0.001 | F(1,28)=127.762                    |
| 5 g | TW ANOVA test, followed by a Tukey's multiple comparison test          | Fig. legend; Result para 5 | 8 in each group | No. of rats per group                                        | Error bars are mean +/- s.e.m | P<0.001 | F(1,28)=235.256                    |
| 6 b | TW ANOVA test, followed by a Tukey's multiple comparison test          | Fig. legend; Result para 6 | 8 in each group | No. of rats per group                                        | Error bars are mean +/- s.e.m | P<0.001 | F(1,28)=1341.31                    |
| 6 d | TW ANOVA test, followed by a Tukey's multiple comparison test          | Fig. legend; Result para 6 | 8 in each group | No. of rats per group                                        | Error bars are mean +/- s.e.m | P<0.001 | F(1,28)=3975.11                    |
| 6 h | TW ANOVA test, followed by a Tukey's multiple comparison test          | Fig. legend; Result para 7 | 7 in each group | No. of rats per group                                        | Error bars are mean +/- s.e.m | P<0.001 | F(1,24)=47.046                     |
| 7 c | One way ANOVA by ranks, followed by a Tukey's                          | Fig. legend; Result para 8 | 6 in each group | No. of hippocampal tissue per group                          | Error bars are mean +/- s.e.m | P=0.010 | H=11.37 with 3 degrees of freedom  |

|     |                                                                                       |                            |                  |                                      |                               |           |                                       |
|-----|---------------------------------------------------------------------------------------|----------------------------|------------------|--------------------------------------|-------------------------------|-----------|---------------------------------------|
|     | multiple comparison test                                                              |                            |                  |                                      |                               |           |                                       |
| 7 d | TW ANOVA test, followed by a Tukey's multiple comparison test                         | Fig. legend; Result para 8 | 6 in each group  | No. of hippocampal tissue per group  | Error bars are mean +/- s.e.m | P=0.014   | F(1,20)=7.310                         |
| 7 e | TW ANOVA test, followed by a Tukey's multiple comparison test                         | Fig. legend; Result para 8 | 6 in each group  | No. of hippocampal tissue per group  | Error bars are mean +/- s.e.m | P=0.002   | F(1,20)=13.266                        |
| 7 h | One way ANOVA by ranks, followed by a Student-Newman – Keuls multiple comparison test | Fig. legend; Result para 8 | 12 in each group | No. of hippocampal tissue per group  | Error bars are mean +/- s.e.m | P = 0.002 | H = 14.798 with 3 degrees of freedom. |
| 7 i | One way ANOVA by ranks, followed by a Student-Newman – Keuls multiple comparison test | Fig. legend; Result para 8 | 12 in each group | No. of hippocampal tissue per group  | Error bars are mean +/- s.e.m | P <0.001  | H = 30.874 with 3 degrees of freedom. |
| 7 j | TW ANOVA test, followed by a Tukey's multiple comparison test                         | Fig. legend; Result para 8 | 12,10,11,10      | No. of slices from 3 to 5 rats/group | Error bars are mean +/- s.e.m | P<0.001   | F(1,35)=56.65                         |
| 8 c | Mann Whitney test                                                                     | Fig. legend; Result para 9 | 5                | No. of cells from 3 rats/group       | Error bars are mean +/- s.e.m | P=0.008   | T=15.00                               |
| 8 e | One way ANOVA by ranks, followed by a Tukey's multiple comparison test                | Fig. legend; Result para 9 | 5 in each group  | No. of cells from 3 rats/group       | Error bars are mean +/- s.e.m | P=0.004   | H=11.06                               |
| 8 h | One way ANOVA test, followed by a Tukey's                                             | Fig. legend; Result para 9 | 7 in each group  | No. of rats per group                | Error bars are mean +/- s.e.m | P<0.001   | F(2,18)=1106.708                      |

|  |                                |  |  |  |  |  |  |
|--|--------------------------------|--|--|--|--|--|--|
|  | multiple<br>comparison<br>test |  |  |  |  |  |  |
|--|--------------------------------|--|--|--|--|--|--|

**Supplementary Table 3: Antibodies**

| <b>Antibody</b>                 | <b>Type</b>        | <b>Dilution</b> | <b>Company</b> | <b>Catalog Number</b> | <b>Figure #</b> |
|---------------------------------|--------------------|-----------------|----------------|-----------------------|-----------------|
| <b>TLR4</b>                     | Rabbit Polyclonal  | 1:500           | Santa Cruz     | H-80                  | Fig 1a          |
| <b>TLR4</b>                     | Mouse Monoclonal   | 1:1000          | Cell Signaling | 2219                  | Fig 7b,c        |
| <b>MAP2</b>                     | Chicken Polyclonal | 1:1000          | AbCam          | ab5392                | Fig. 2a         |
| <b>NeuN</b>                     | Mouse monoclonal   | 1:1000          | Millipore      | MAB377                | Fig. 1a         |
| <b>GluA1</b>                    | Rabbit Polyclonal  | 1:1000          | Millipore      | MAB1504               | Fig 1h          |
| <b>GluA2</b>                    | Mouse monoclonal   | 1:1000          | Millipore      | MAB397                | Fig 1h          |
| <b>GFAP</b>                     | Mouse monoclonal   | 1:1000          | Millipore      | MAB360                | Fig 2b, 7b      |
| <b>IBA-1</b>                    | Mouse monoclonal   | 1:1000          | Millipore      | MABN92                | Fig 2b, 7b      |
| <b><math>\beta</math>-actin</b> | Mouse monoclonal   | 1:5000          | Sigma-Aldrich  | A5441                 | Fig 1h,7b       |
| <b>CD45</b>                     | Mouse IgG1         | 1:50            | BD Biosciences | 740258                | Fig7f           |
| <b>CD45 Isotype control</b>     | Mouse IgG1         | 1:50            | BD Biosciences | 563547                | -               |
| <b>CD4</b>                      | Mouse IgG2a        | 1:50            | BD Biosciences | 550296                | Fig 7f          |
| <b>CD4 Isotype</b>              | Mouse IgG2a        | 1:50            | BD Biosciences | 550339                | -               |
| <b>CD3</b>                      | Mouse IgM          | 1:50            | BD Biosciences | 557030                | Fig 7f          |
| <b>CD3 Isotype Control</b>      | Mouse IgM          | 1:50            | BD Biosciences | 550883                | -               |
| <b>Ox42</b>                     | Mouse IgG2a        | 1:100           | BioLegend      | 201820                | Fig 7f          |
| <b>Ox42 Isotype Control</b>     | Mouse IgG2a        | 1:100           | BioLegend      | 400258                | -               |
| <b>Gr1</b>                      | Mouse IgG2a        | 1:50            | BD Biosciences | 550002                | Fig 7f          |
| <b>Gr-1 Isotype Control</b>     | Mouse IgG2a        | 1:50            | BD Biosciences | 553457                | -               |
